# Supplementary material for: Cross-platform transcriptomic profiling of the response to recombinant human erythropoietin
Source: PubMed Central journal article supplement (PMC8568984; doi:10.1038/s41598-021-00608-9), 2021-11-04
Supplement: 41598_2021_608_MOESM2_ESM.pdf [file 41598_2021_608_MOESM2_ESM.pdf]

# Supplementary Information for

## **Cross-platform transcriptomic profiling of the response to recombinant human erythropoietin**

Guan Wang<sup>1,2\*</sup>, Traci Kitaoka<sup>3</sup>, Ali Crawford<sup>3</sup>, Qian Mao<sup>4</sup>, Andrew Hesketh<sup>5</sup>, Fergus M. Guppy<sup>5,6</sup>, Garrett I. Ash<sup>7,8</sup>, Jason Liu<sup>9</sup>, Mark B. Gerstein<sup>9-12</sup>, Yannis P. Pitsiladis<sup>6\*</sup>

\*Corresponding authors. Email: [g.wang2@brighton.ac.uk](mailto:g.wang2@brighton.ac.uk); [y.pitsiladis@brighton.ac.uk](mailto:y.pitsiladis@brighton.ac.uk).

### **This document includes:**

Supplementary Figs. S1 to S10  
Supplementary Table S1 to S7  
Captions for Supplementary Data 1 to 16

### **Other Supplementary Information for this manuscript include the following:**

Supplementary Data 1 to 16

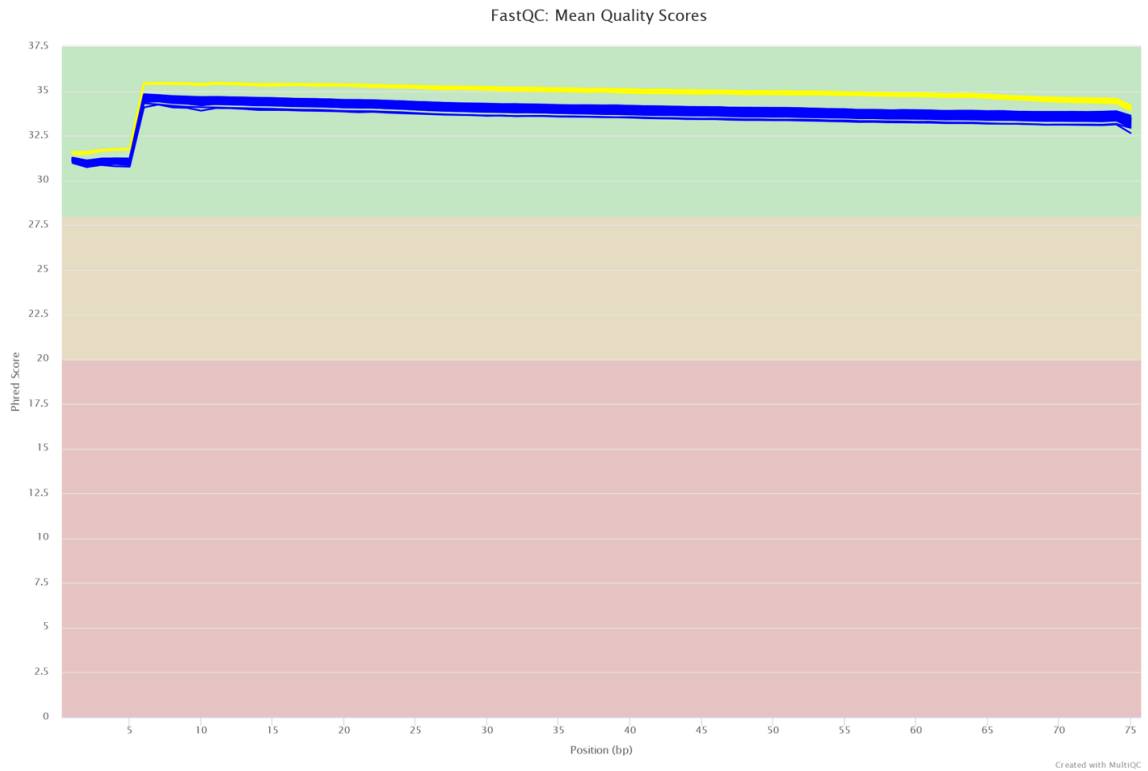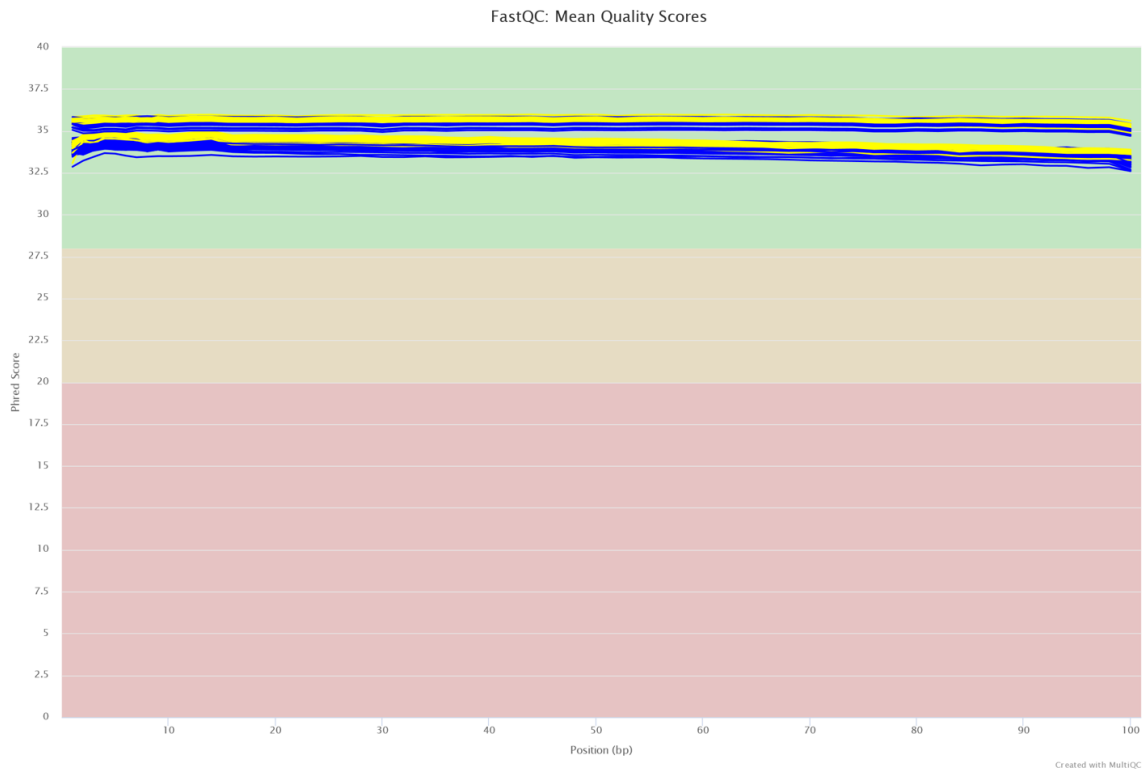

**Supplementary Fig. S1. FastQC per base sequence quality scores of the Illumina (upper panel; excluding sample 33 and 40) and MGI (lower panel) sequencing reads. Yellow Line: Read 1 data; Blue Line: Read 2 data.**

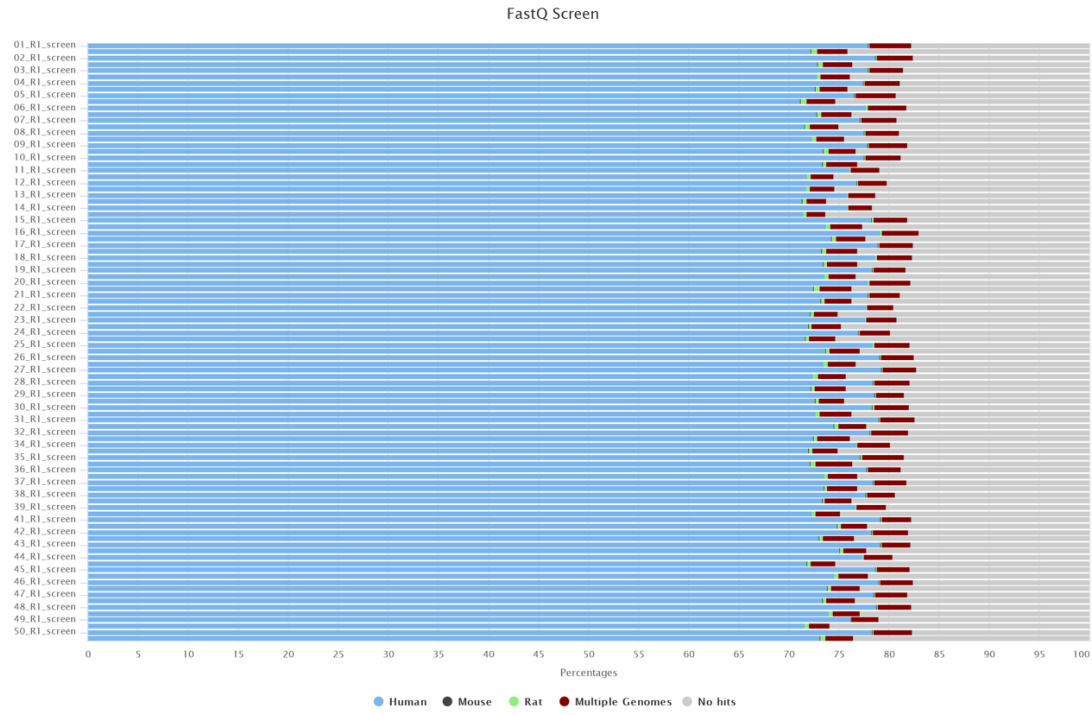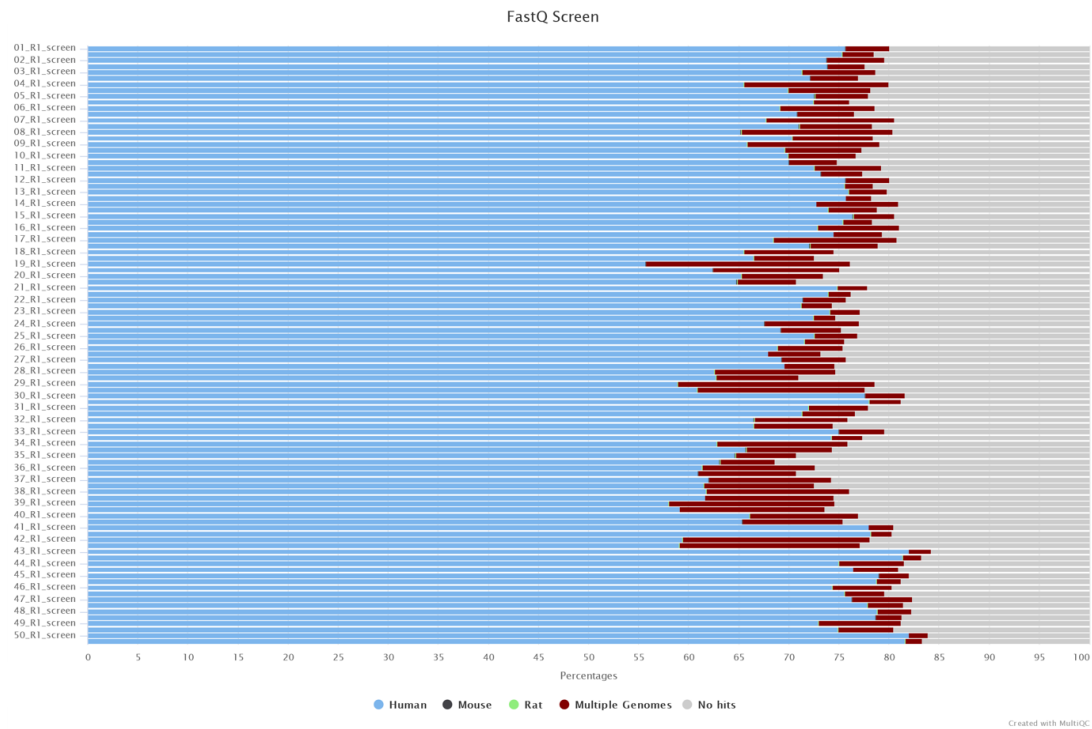

**Supplementary Fig. S2. FastQ Screen results plotted against human, mouse and rat genomes for Read 1 (R1) and Read 2 (R2) sequences showing the library compositions to detecting potential sample contamination following RNA-seq on the Illumina (upper panel; excluding sample 33 and 40) and MGI (lower panel) platforms.**

RSeQC: Read Distribution

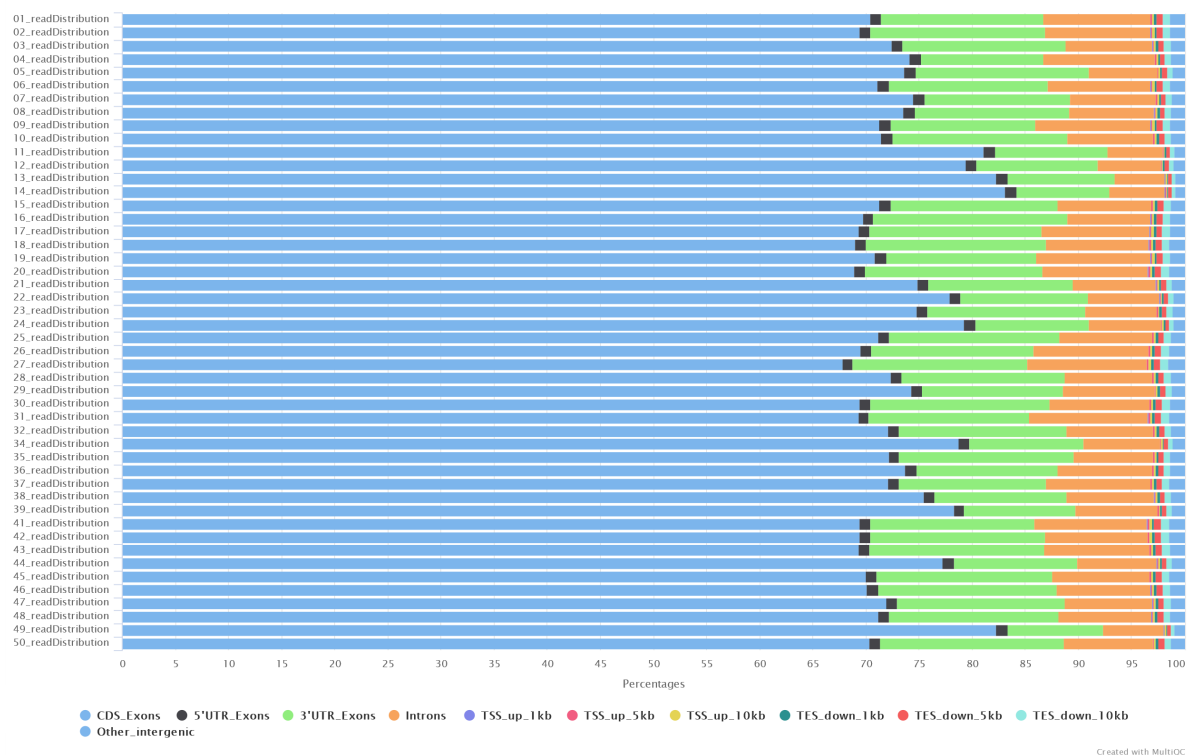

RSeQC: Read Distribution

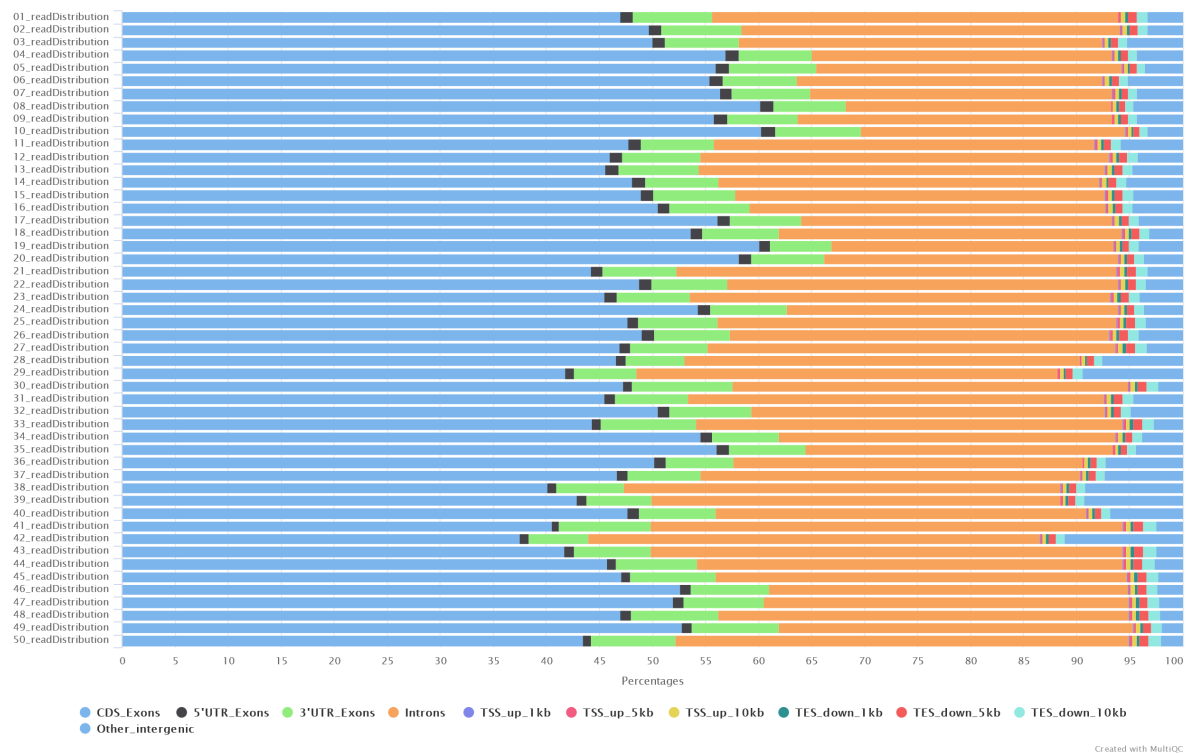

**Supplementary Fig. S3. RSeQC read distribution across the Illumina (N=48; upper panel) and MGI (N=50; lower panel) sequencing platforms.**

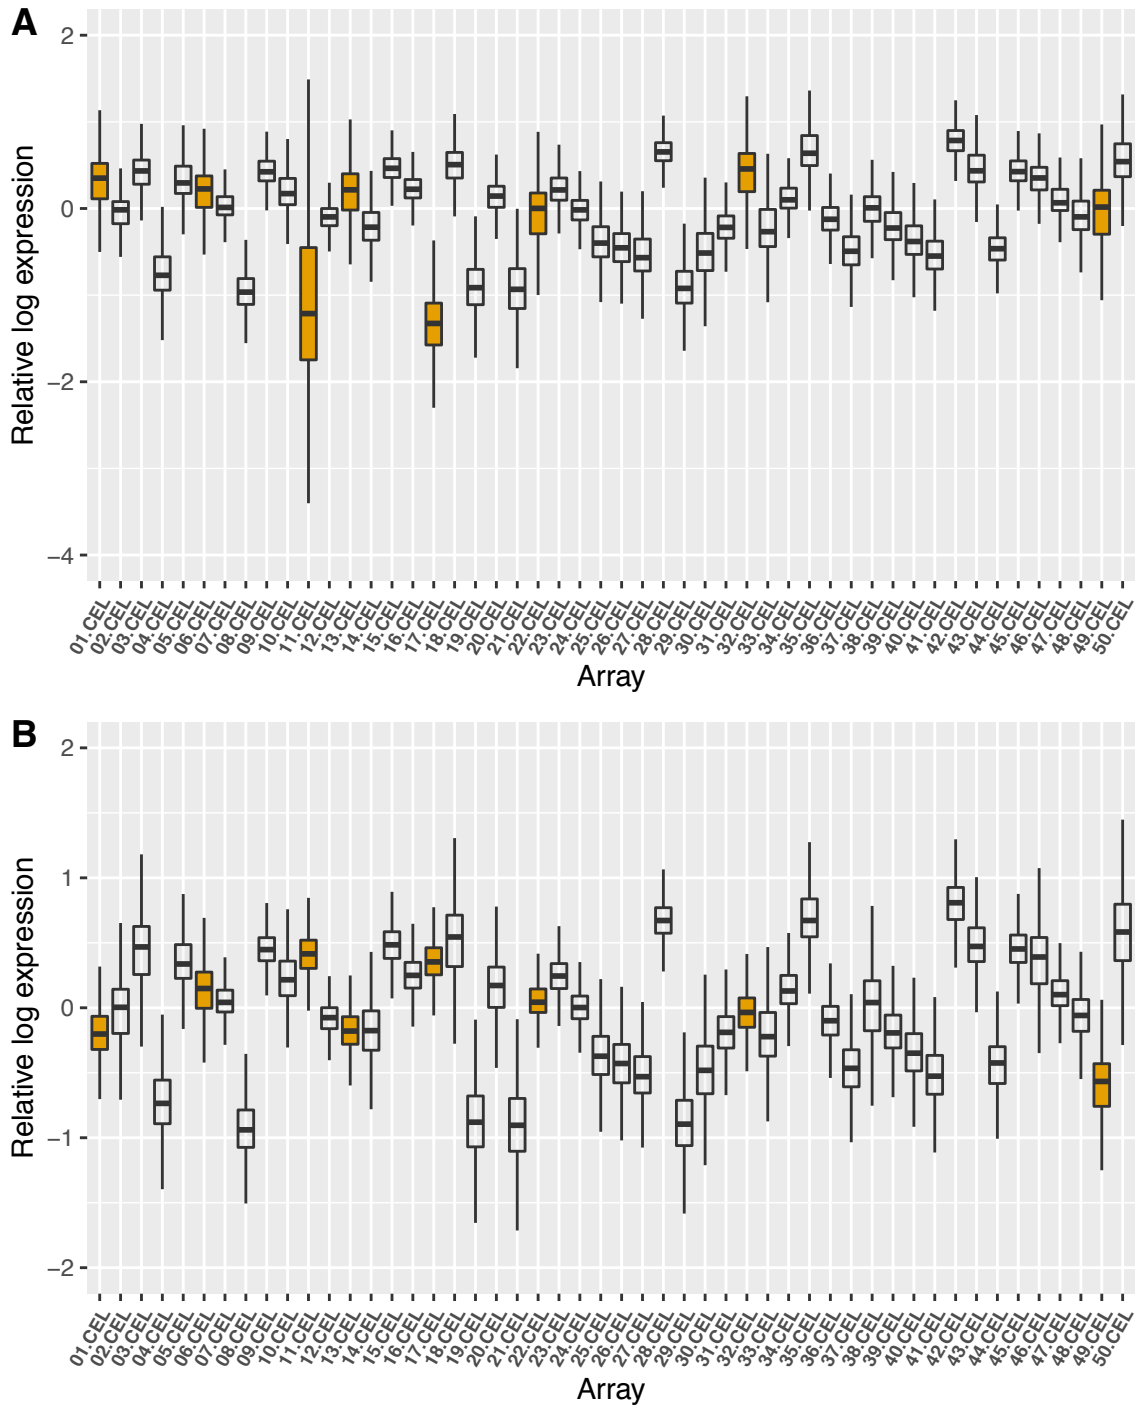

**Supplementary Fig. S4. Distribution of the relative  $\log_2$  expression of background corrected intensities of each transcript against their median intensities across all samples tested on the GeneChip arrays. Panel A shows eight samples (boxes filled in yellow) with relatively high variability compared to other samples in the dataset. Panel B illustrates the improved intensity distribution of the eight samples after target re-prep and re-scanning.**

**A**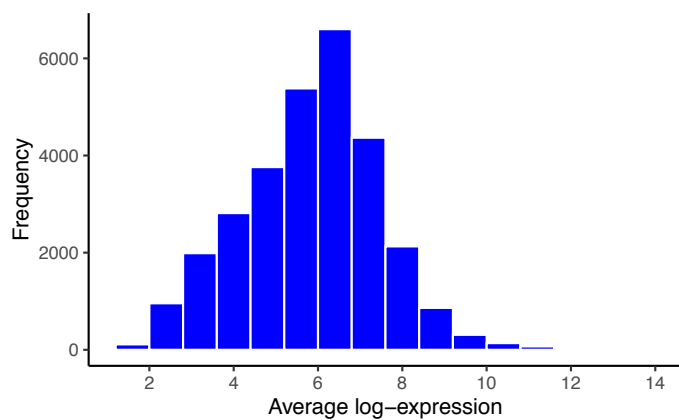**B**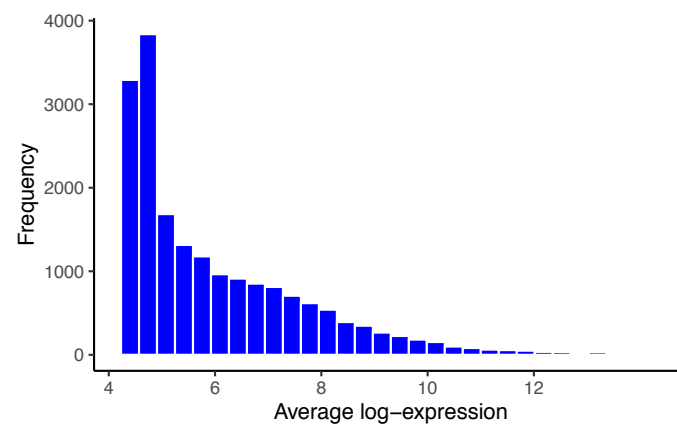**C**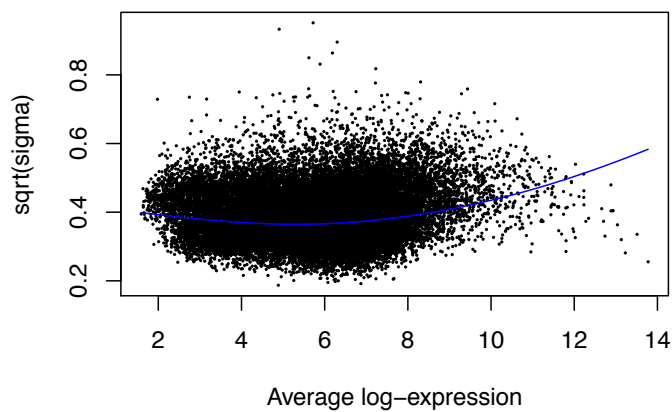**D**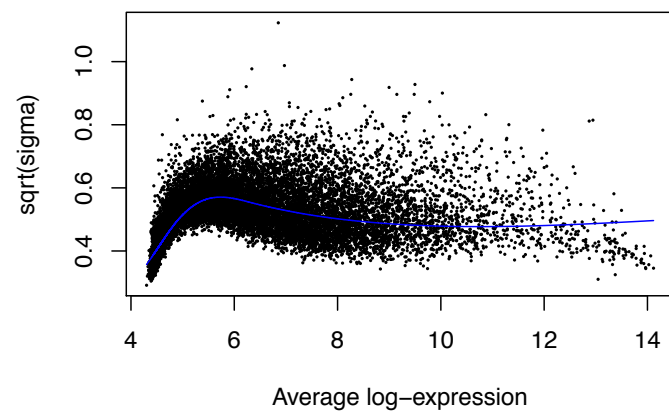

1  
2  
3  
4

**Supplementary Fig. S5. Histograms of the average  $\log_2$  expression and the mean-variance limma-trend plots of the detected features on the GeneChip (panel A and C) and BeadChip (panel B and D) platforms. sigma: the estimated residual standard deviation. Blue line: the fitted limma trend in C and D.**

5

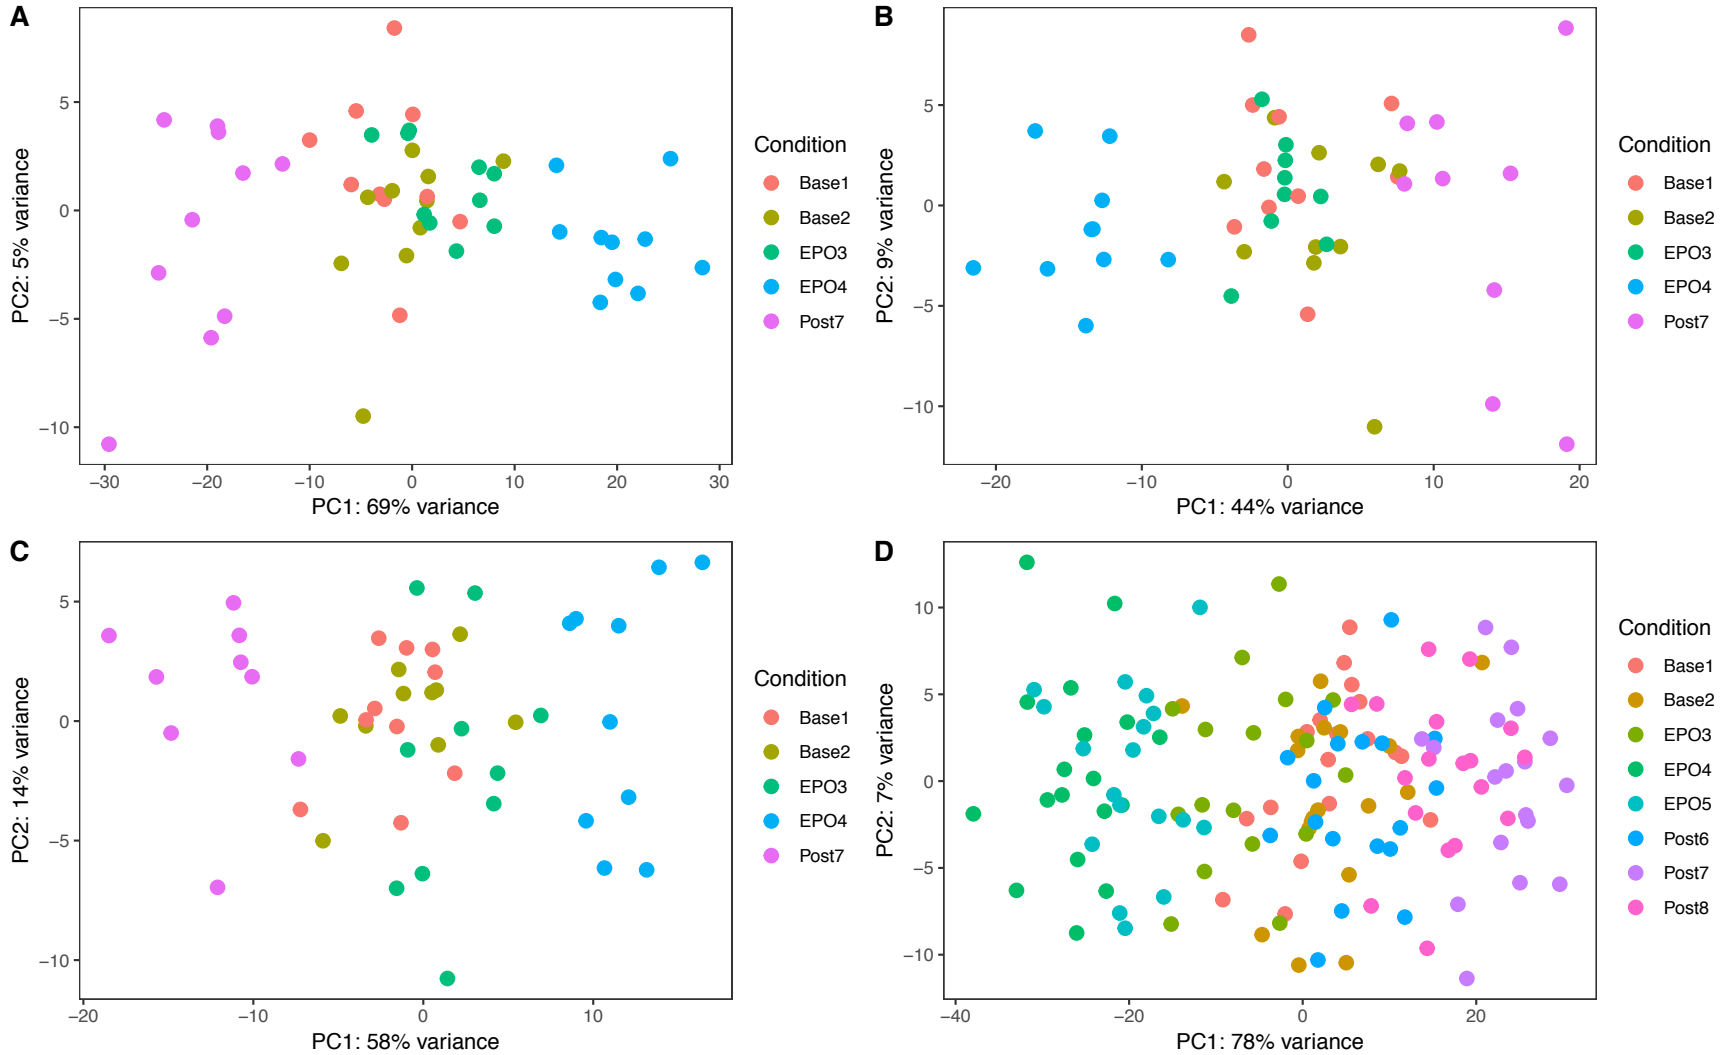

6

7

8

9

**Supplementary Fig. S6. Principal component analysis of the top 500 genes ranked by the sample variance across the RNA-seq and microarray platforms.** A: MGI DNBSEQ-G400RS, B: Illumina NextSeq 500; C: GeneChip HTA2.0; D: Illumina HumanHT-12 v4 Expression BeadChip.



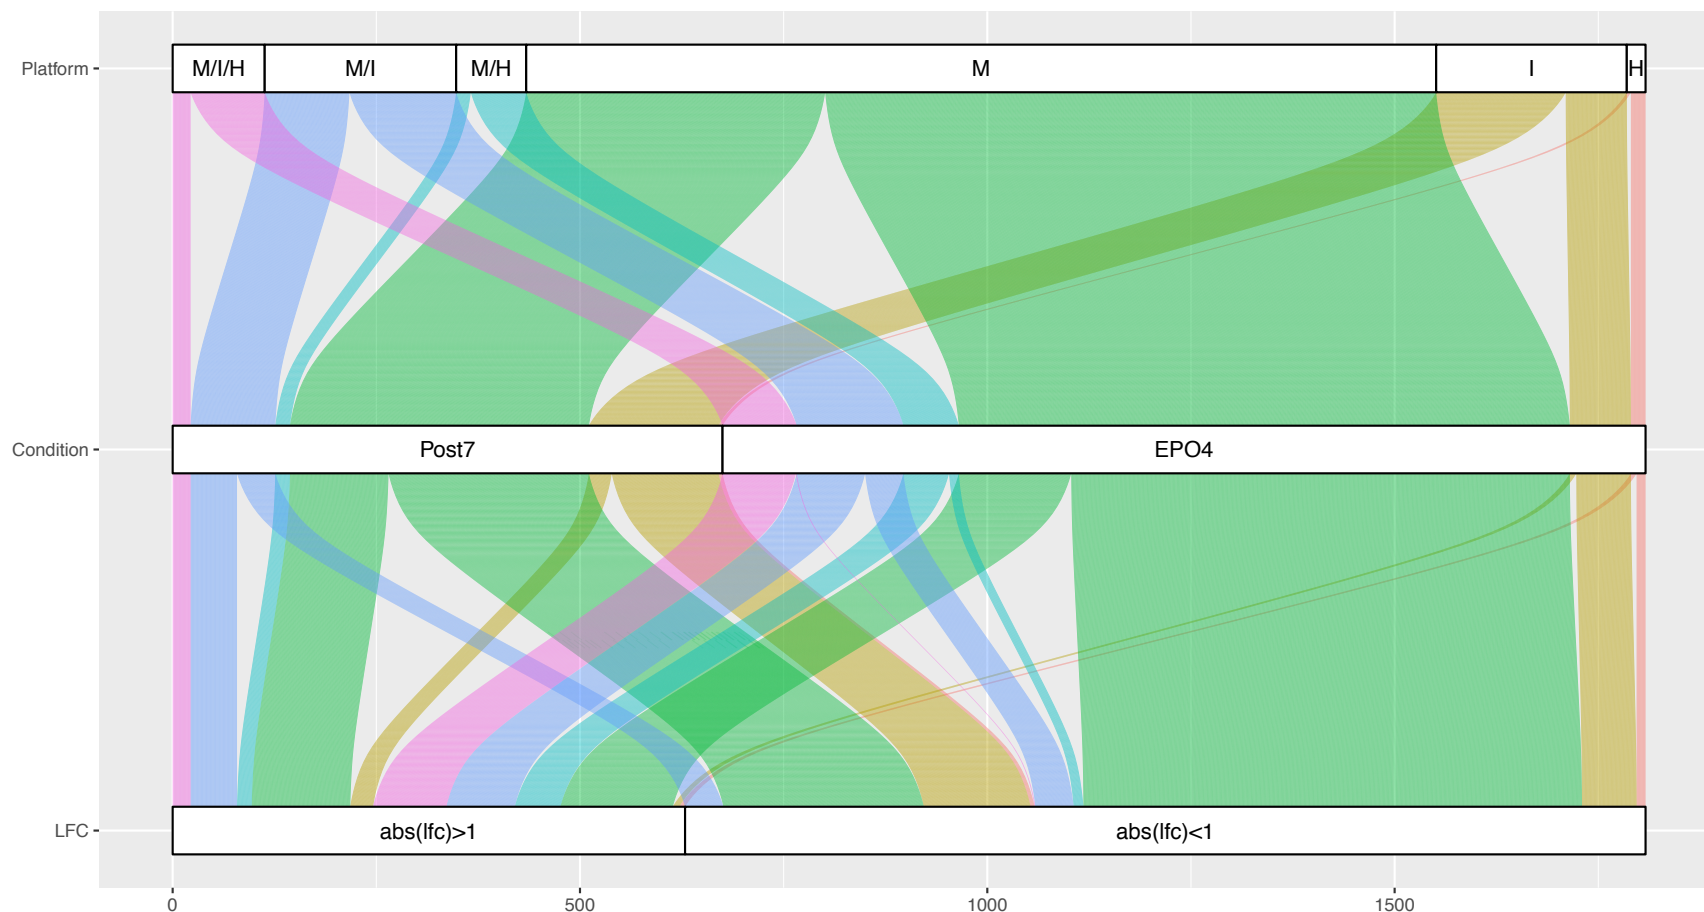

11  
12  
13  
14  
15  
16  
17

**Supplementary Fig. S7. Sankey diagram showing the flow of the differentially expressed gene features stratified by platform, biological condition and absolute  $\log_2$ -transformed fold changes.** M/I/H: MGI RNA-seq/Illumina RNA-seq/HTA2.0; M/I: MGI RNA-seq/Illumina RNA-seq; M/H: MGI RNA-seq/HTA2.0; M: MGI RNA-seq; I: Illumina RNA-seq; and H: HTA2.0. abs(lfc): absolute  $\log_2$ -transformed fold change. The colour coded band represents a detection platform or a combination of the detection platforms. The wider the band, the higher number of the identified features on a platform or across platforms. The x-axis represents the number of identified features captured on each platform. Note, for M/I/H, M/I, and M/H, that biological magnitude of the features

18 used for stratification is based on the MGI RNA-seq DGE results. Thirty-four identified non-protein coding transcript clusters on the  
19 GeneChip are removed for the purposes of cross-platform comparison

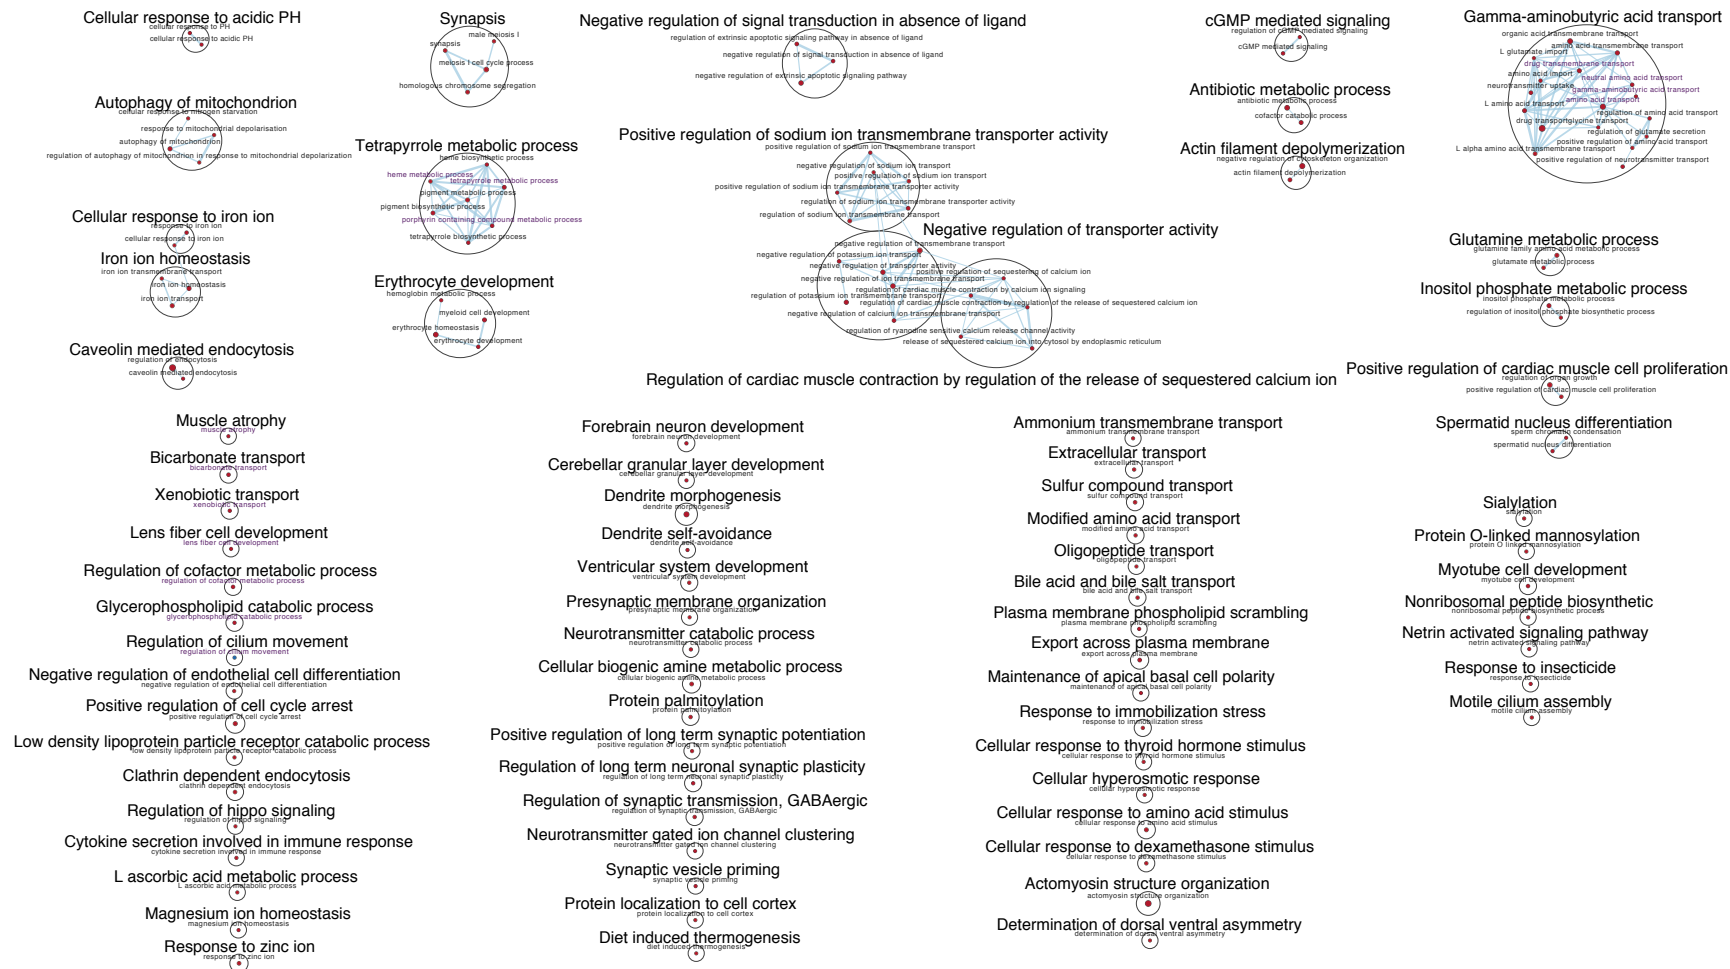

**Supplementary Fig. S8. Biological network of the GeneChip dataset following Gene Ontology (biological process) gene set enrichment analysis in GSEA (v4.0.3) and visualisation in Cytoscape (3.8.0).** Each circle (node) represents a gene set and two nodes are connected by lines (edges) indicating shared genes. The size of a node and width of an edge are proportional to the number of genes enriched in a gene set and the number of genes shared between gene sets, respectively. Gene sets that are similar were

annotated and clustered to form a biological theme using the AutoAnnotate App in Cytoscape. The most significantly enriched gene set is used to label a gene set cluster, defined by NES. Red node: gene set enriched in EPO4. Blue node: gene set negatively correlated with EPO4. Purple node label: top gene sets with NES >1.90. The enrichment map was created with pathway FDR<0.1, nominal P<0.05 and Jaccard Overlap coefficient >0.375 with combined constant k=0.5.

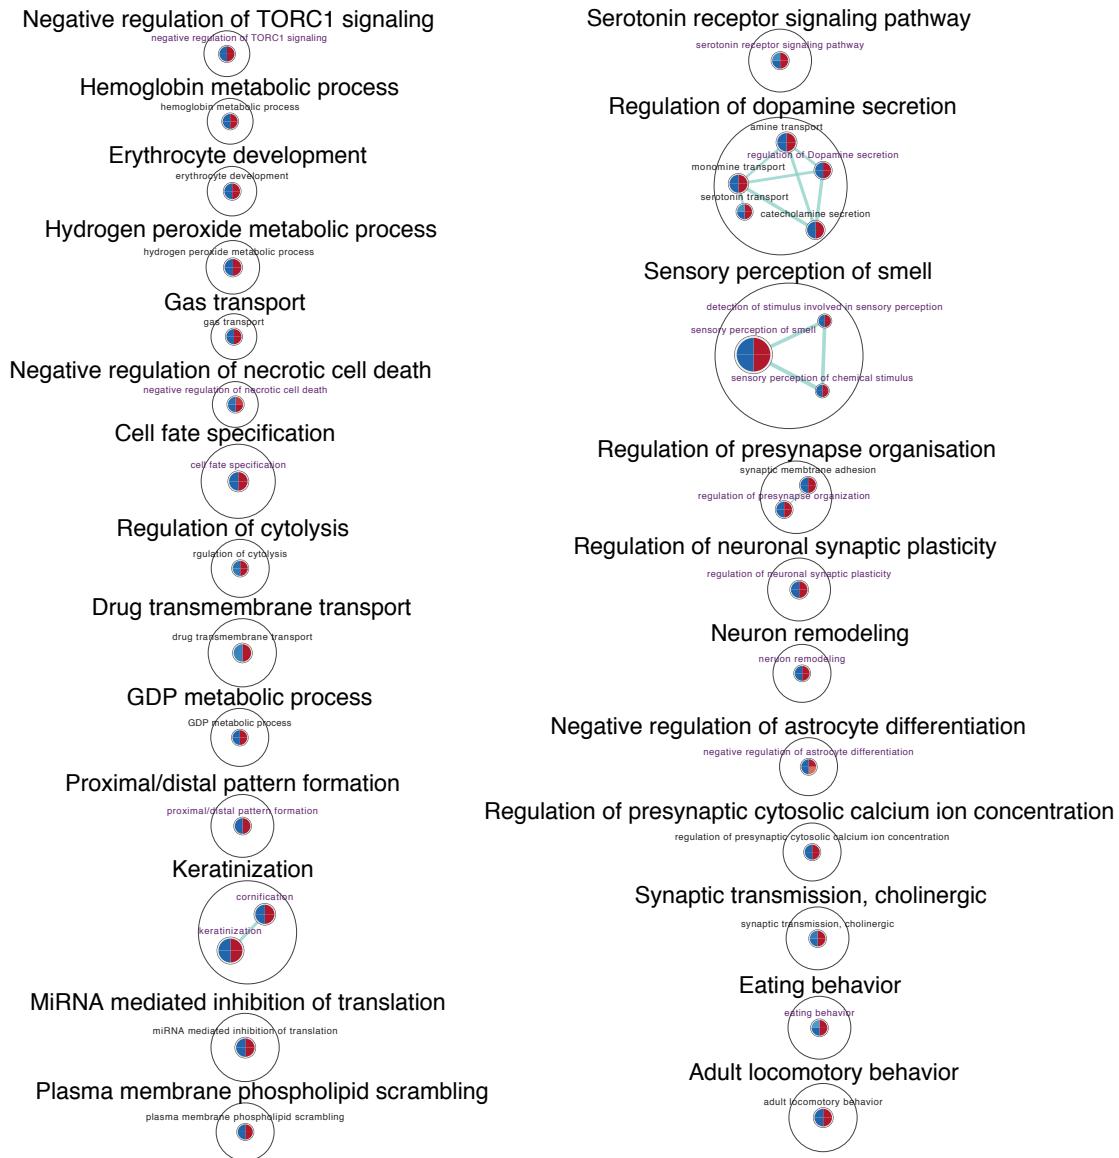

**Supplementary Fig. S9. Biological network of the BeadChip datasets following Gene Ontology (biological process) gene set enrichment analysis in GSEA (v4.0.3) and visualisation in Cytoscape (3.8.0).** Each circle (node) represents a gene set and two nodes are connected by lines (edges) indicating shared genes. The size of a node and width of an edge are proportional to the number of genes enriched in a gene set and the number of genes shared between gene sets, respectively. Gene sets that are similar were annotated and clustered to form a biological theme using the AutoAnnotate App in Cytoscape. The most significantly enriched gene set is used to label a gene set cluster, defined by NES. Red node: gene sets enriched in EPO4 and 5. Blue node: gene sets enriched in Post 7 and 8. Purple node label: top gene sets with NES >1.90. The enrichment map was created with pathway FDR<0.1, nominal P<0.05 and Jaccard Overlap coefficient >0.375 with combined constant k=0.5.

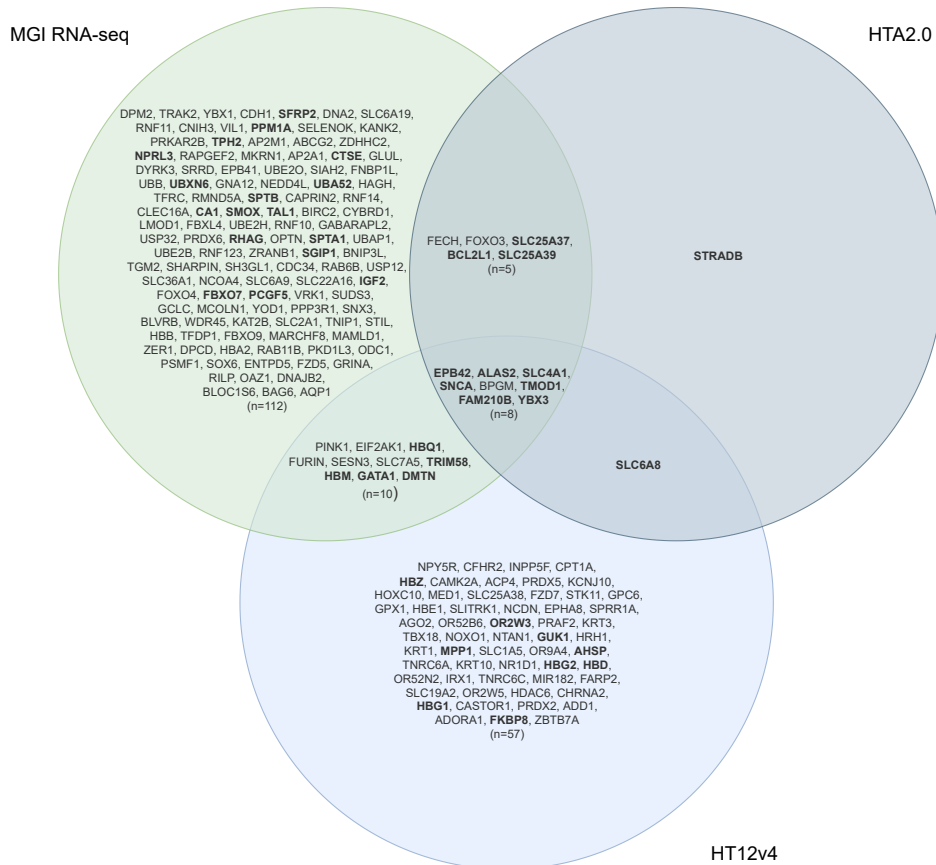

**Supplementary Fig. S10. Genes differentially expressed and prioritised across the platforms and across the time points following the DGE and GSEA analyses.** Genes highlighted in bold (n=43) were also significantly expressed following Illumina RNA-seq. The diagram was drawn using the online open source tool, draw.io (v15.0.4; <https://github.com/jgraph/drawio>).

| Sample | % Aligned_Illumina | Reads in Million Aligned_Illumina | % Aligned_MGI | Reads in Million Aligned_MGI |
|--------|--------------------|-----------------------------------|---------------|------------------------------|
| 01     | 94.1               | 109.9                             | 96.0          | 157.9                        |
| 02     | 94.8               | 130.7                             | 95.8          | 210.5                        |
| 03     | 94.8               | 116.2                             | 95.1          | 154.9                        |
| 04     | 94.1               | 135.6                             | 95.5          | 148.7                        |
| 05     | 94.3               | 113.8                             | 95.6          | 151.5                        |
| 06     | 94.7               | 114.8                             | 95.7          | 168.1                        |
| 07     | 95.0               | 117.7                             | 95.9          | 152.9                        |
| 08     | 94.9               | 101.8                             | 96.2          | 179.9                        |
| 09     | 94.8               | 116.1                             | 96.0          | 160.8                        |
| 10     | 95.4               | 112.0                             | 91.5          | 162.2                        |
| 11     | 95.7               | 102.9                             | 91.7          | 161.3                        |
| 12     | 95.6               | 96.4                              | 91.5          | 166.3                        |
| 13     | 95.3               | 92.7                              | 94.8          | 184.0                        |
| 14     | 95.6               | 81.2                              | 92.6          | 170.1                        |
| 15     | 95.3               | 82.9                              | 92.7          | 173.7                        |
| 16     | 95.0               | 115.6                             | 91.5          | 167.0                        |
| 17     | 94.7               | 129.0                             | 92.7          | 166.5                        |
| 18     | 94.8               | 123.8                             | 93.2          | 189.3                        |
| 19     | 95.2               | 129.9                             | 91.9          | 179.7                        |
| 20     | 94.2               | 97.3                              | 92.4          | 209.8                        |
| 21     | 95.2               | 105.4                             | 89.4          | 183.0                        |
| 22     | 94.6               | 109.5                             | 92.2          | 216.4                        |
| 23     | 95.3               | 105.8                             | 97.3          | 247.0                        |
| 24     | 95.4               | 103.1                             | 95.9          | 196.5                        |
| 25     | 95.2               | 99.1                              | 93.0          | 182.6                        |
| 26     | 93.7               | 117.3                             | 92.0          | 175.1                        |
| 27     | 94.4               | 117.1                             | 91.7          | 165.7                        |
| 28     | 95.0               | 112.7                             | 92.4          | 164.3                        |
| 29     | 94.7               | 157.0                             | 90.9          | 178.5                        |
| 30     | 94.2               | 102.9                             | 90.1          | 209.8                        |
| 31     | 94.8               | 122.0                             | 91.1          | 237.6                        |
| 32     | 95.2               | 115.5                             | 91.2          | 311.3                        |
| 33     | -                  | -                                 | 89.6          | 212.3                        |
| 34     | 95.2               | 111.2                             | 92.8          | 230.4                        |
| 35     | 95.0               | 102.5                             | 96.1          | 215.2                        |
| 36     | 95.2               | 107.5                             | 96.5          | 281.5                        |
| 37     | 95.7               | 98.6                              | 91.6          | 225.0                        |
| 38     | 95.5               | 102.1                             | 97.5          | 191.6                        |
| 39     | 95.7               | 118.1                             | 96.9          | 311.7                        |
| 40     | -                  | -                                 | 97.3          | 195.6                        |
| 41     | 94.5               | 97.6                              | 97.1          | 303.1                        |
| 42     | 95.3               | 103.8                             | 97.7          | 216.2                        |
| 43     | 95.3               | 96.1                              | 97.2          | 190.5                        |
| 44     | 95.2               | 102.9                             | 97.3          | 212.0                        |
| 45     | 95.5               | 100.7                             | 97.8          | 225.4                        |
| 46     | 95.0               | 115.9                             | 95.6          | 215.7                        |
| 47     | 95.1               | 116.6                             | 96.1          | 202.4                        |
| 48     | 95.8               | 123.2                             | 96.3          | 207.0                        |
| 49     | 94.8               | 113.5                             | 95.4          | 194.9                        |
| 50     | 94.3               | 100.1                             | 95.8          | 183.6                        |

|                |      |       |      |       |
|----------------|------|-------|------|-------|
| <b>Average</b> | 95.0 | 110.4 | 94.2 | 197.9 |
|----------------|------|-------|------|-------|

**Supplementary Table S1. HISAT2 alignment against the reference genome assembly (GRCh38.p12) with Ensembl 94 annotation showing the overall alignment rates and the total reads in million on the Illumina (N=48) and MGI (N=50) sequencing platforms.**



| Sample | Total Reads in Million_Illumina | % CDS_ Exons_ Illumina | % Intron_ Illumina | Total Reads in Million_MGI | % CDS_ Exons_ MGI | % Intron_ MGI |
|--------|---------------------------------|------------------------|--------------------|----------------------------|-------------------|---------------|
| 01     | 103.5                           | 72.2                   | 10.3               | 151.6                      | 49.3              | 40.1          |
| 02     | 127.6                           | 71.1                   | 10.1               | 201.7                      | 52.1              | 37.4          |
| 03     | 123.9                           | 74.1                   | 8.4                | 174.3                      | 53.5              | 36.6          |
| 04     | 110.2                           | 75.7                   | 10.7               | 188.5                      | 60.2              | 29.9          |
| 05     | 107.3                           | 75.1                   | 6.6                | 206.9                      | 58.7              | 30.2          |
| 06     | 96.6                            | 72.8                   | 9.9                | 206.2                      | 59.1              | 30.7          |
| 07     | 108.7                           | 76.0                   | 8.2                | 194.5                      | 59.6              | 30.1          |
| 08     | 111.8                           | 75.1                   | 8.1                | 199.3                      | 63.8              | 26.5          |
| 09     | 110.0                           | 73.0                   | 11.1               | 185.9                      | 59.1              | 31.3          |
| 10     | 106.8                           | 73.0                   | 8.2                | 175.9                      | 63.0              | 26.1          |
| 11     | 98.4                            | 82.4                   | 5.2                | 147.4                      | 51.4              | 38.6          |
| 12     | 92.1                            | 80.8                   | 6.0                | 142.0                      | 48.6              | 40.8          |
| 13     | 88.3                            | 83.4                   | 4.8                | 144.8                      | 48.5              | 40.7          |
| 14     | 77.7                            | 84.3                   | 5.3                | 160.8                      | 51.5              | 38.5          |
| 15     | 79.0                            | 73.0                   | 9.0                | 146.6                      | 52.1              | 37.1          |
| 16     | 109.8                           | 71.5                   | 8.0                | 173.1                      | 53.7              | 35.7          |
| 17     | 122.2                           | 71.1                   | 10.4               | 154.4                      | 59.3              | 30.9          |
| 18     | 117.4                           | 70.8                   | 9.9                | 148.3                      | 56.1              | 33.9          |
| 19     | 123.6                           | 72.5                   | 11.0               | 147.9                      | 63.3              | 28.0          |
| 20     | 91.7                            | 70.7                   | 10.2               | 152.1                      | 61.1              | 29.1          |
| 21     | 100.4                           | 76.4                   | 8.0                | 157.6                      | 46.4              | 43.5          |
| 22     | 100.8                           | 79.3                   | 6.8                | 160.9                      | 51.2              | 38.6          |
| 23     | 103.6                           | 76.2                   | 6.9                | 152.9                      | 48.1              | 41.9          |
| 24     | 98.4                            | 80.6                   | 6.9                | 154.3                      | 57.0              | 32.8          |
| 25     | 94.4                            | 72.8                   | 8.9                | 176.5                      | 50.1              | 39.5          |
| 26     | 148.7                           | 71.3                   | 11.0               | 165.2                      | 51.9              | 37.8          |
| 27     | 110.0                           | 69.6                   | 11.6               | 193.9                      | 49.3              | 40.4          |
| 28     | 110.5                           | 74.0                   | 8.4                | 163.5                      | 51.0              | 40.8          |
| 29     | 107.1                           | 75.8                   | 8.8                | 199.4                      | 46.8              | 44.4          |
| 30     | 96.9                            | 71.2                   | 9.6                | 240.3                      | 49.1              | 38.7          |
| 31     | 105.9                           | 71.1                   | 11.4               | 169.7                      | 48.4              | 41.7          |
| 32     | 115.6                           | 73.7                   | 8.3                | 161.1                      | 53.9              | 35.4          |
| 33     | -                               | -                      | -                  | 151.9                      | 46.2              | 41.9          |
| 34     | 100.9                           | 80.1                   | 7.4                | 151.8                      | 57.4              | 33.4          |
| 35     | 97.4                            | 73.8                   | 7.6                | 162.3                      | 59.3              | 30.6          |
| 36     | 97.5                            | 75.4                   | 9.1                | 188.9                      | 54.8              | 35.9          |
| 37     | 102.3                           | 73.9                   | 10.0               | 216.4                      | 51.0              | 39.1          |
| 38     | 94.4                            | 77.1                   | 8.4                | 284.0                      | 44.7              | 45.9          |
| 39     | 113.0                           | 79.8                   | 7.9                | 190.3                      | 47.9              | 43.0          |
| 40     | -                               | -                      | -                  | 213.8                      | 51.8              | 37.9          |
| 41     | 91.6                            | 71.2                   | 10.9               | 271.5                      | 42.3              | 46.4          |
| 42     | 92.3                            | 71.2                   | 9.9                | 206.1                      | 42.8              | 48.5          |
| 43     | 98.9                            | 71.0                   | 10.1               | 186.9                      | 43.5              | 46.3          |
| 44     | 98.0                            | 78.7                   | 7.6                | 301.9                      | 47.7              | 41.9          |
| 45     | 96.2                            | 71.7                   | 9.4                | 190.4                      | 48.9              | 40.3          |
| 46     | 110.0                           | 71.8                   | 9.1                | 294.4                      | 54.7              | 35.2          |
| 47     | 107.6                           | 73.5                   | 8.5                | 211.2                      | 53.9              | 35.8          |
| 48     | 110.9                           | 72.8                   | 9.0                | 185.2                      | 48.7              | 40.2          |
| 49     | 118.0                           | 83.5                   | 5.8                | 206.3                      | 54.6              | 34.6          |
| 50     | 94.4                            | 72.0                   | 8.6                | 220.5                      | 45.1              | 44.3          |

|                |       |      |     |       |      |      |
|----------------|-------|------|-----|-------|------|------|
| <b>Average</b> | 104.6 | 74.8 | 8.7 | 186.6 | 52.4 | 37.4 |
|----------------|-------|------|-----|-------|------|------|

**Supplementary Table S2. RSeQC read distribution including the total reads, % CDS\_Exons tag counts and % intron tag counts aligned to the reference genome assembly (GRCh38.p12) with Ensembl 94 annotation on the Illumina (N=48) and MGI (N=50) sequencing platforms. CDS: coding sequences.**

| <b>Sample</b>  | <b>% Aligned_Illumina</b> | <b>Reads in Million Aligned_Illumina</b> | <b>% Aligned_MGI</b> | <b>Reads in Million Aligned_MGI</b> |
|----------------|---------------------------|------------------------------------------|----------------------|-------------------------------------|
| <b>01</b>      | 79.0                      | 43.4                                     | 38.8                 | 30.7                                |
| <b>02</b>      | 79.6                      | 54                                       | 40.6                 | 42.7                                |
| <b>03</b>      | 81.8                      | 53.4                                     | 38.5                 | 35.4                                |
| <b>04</b>      | 78.5                      | 45.6                                     | 39.0                 | 38.3                                |
| <b>05</b>      | 84.5                      | 48.1                                     | 48.4                 | 52.1                                |
| <b>06</b>      | 80.0                      | 40.8                                     | 42.2                 | 45.5                                |
| <b>07</b>      | 82.4                      | 47.3                                     | 41.2                 | 41.7                                |
| <b>08</b>      | 82.7                      | 48.6                                     | 42.8                 | 44.3                                |
| <b>09</b>      | 78.5                      | 45.6                                     | 38.1                 | 37.1                                |
| <b>10</b>      | 83.1                      | 46.5                                     | 49.7                 | 45.6                                |
| <b>11</b>      | 85.4                      | 44                                       | 36.9                 | 28.6                                |
| <b>12</b>      | 85.5                      | 41.2                                     | 38.2                 | 28.4                                |
| <b>13</b>      | 86.3                      | 40                                       | 38.8                 | 29.4                                |
| <b>14</b>      | 86.4                      | 35.1                                     | 36.5                 | 30.7                                |
| <b>15</b>      | 81.2                      | 33.7                                     | 42.1                 | 32.2                                |
| <b>16</b>      | 82.7                      | 47.8                                     | 39.8                 | 35.8                                |
| <b>17</b>      | 80.1                      | 51.7                                     | 40.5                 | 32.6                                |
| <b>18</b>      | 80.3                      | 49.7                                     | 38.6                 | 31.3                                |
| <b>19</b>      | 79.3                      | 51.5                                     | 33.0                 | 26.6                                |
| <b>20</b>      | 80.0                      | 38.9                                     | 43.6                 | 36.2                                |
| <b>21</b>      | 82.3                      | 43.4                                     | 36.9                 | 31.4                                |
| <b>22</b>      | 84.4                      | 44.7                                     | 39.5                 | 34.3                                |
| <b>23</b>      | 84.0                      | 46                                       | 38.2                 | 31.9                                |
| <b>24</b>      | 84.7                      | 43.7                                     | 40.7                 | 33.9                                |
| <b>25</b>      | 81.8                      | 40.5                                     | 40.4                 | 38.2                                |
| <b>26</b>      | 79.1                      | 62.1                                     | 38.7                 | 34.8                                |
| <b>27</b>      | 78.2                      | 45.9                                     | 36.0                 | 37.8                                |
| <b>28</b>      | 82.5                      | 48.3                                     | 28.7                 | 26.3                                |
| <b>29</b>      | 82.3                      | 46.4                                     | 28.3                 | 30.6                                |
| <b>30</b>      | 80.8                      | 41.6                                     | 42.8                 | 52.8                                |
| <b>31</b>      | 77.9                      | 43.3                                     | 37.7                 | 34.4                                |
| <b>32</b>      | 82.9                      | 50.6                                     | 41.2                 | 36.1                                |
| <b>33</b>      | -                         | -                                        | 39.1                 | 32.4                                |
| <b>34</b>      | 83.7                      | 44.3                                     | 36.3                 | 29.8                                |
| <b>35</b>      | 83.7                      | 42.9                                     | 45.7                 | 40.8                                |
| <b>36</b>      | 81.8                      | 41.8                                     | 37.1                 | 38.9                                |
| <b>37</b>      | 80.5                      | 43.3                                     | 35.7                 | 42.4                                |
| <b>38</b>      | 82.8                      | 40.8                                     | 29.8                 | 46.4                                |
| <b>39</b>      | 83.6                      | 49.3                                     | 29.8                 | 31.6                                |
| <b>40</b>      | -                         | -                                        | 39.6                 | 45.7                                |
| <b>41</b>      | 78.2                      | 37.6                                     | 35.4                 | 49.8                                |
| <b>42</b>      | 79.8                      | 39                                       | 29.3                 | 32.9                                |
| <b>43</b>      | 79.7                      | 41.4                                     | 37.8                 | 36.2                                |
| <b>44</b>      | 83.3                      | 42.9                                     | 36.1                 | 56.2                                |
| <b>45</b>      | 81.1                      | 40.8                                     | 41.8                 | 40.9                                |
| <b>46</b>      | 80.8                      | 46.8                                     | 43.2                 | 65.4                                |
| <b>47</b>      | 82.0                      | 46.6                                     | 44.3                 | 47.9                                |
| <b>48</b>      | 80.8                      | 47.1                                     | 41.6                 | 39.6                                |
| <b>49</b>      | 86.6                      | 53.4                                     | 42.4                 | 45                                  |
| <b>50</b>      | 82.1                      | 41.1                                     | 39.6                 | 44.6                                |
| <b>Average</b> | 81.9                      | 45.1                                     | 38.8                 | 38.3                                |

**Supplementary Table S3. Salmon alignment rates and reads in million following Illumina (N=48) and MGI (N=50) RNA-seq. Salmon indexing against Ensembl 94 annotated coding transcriptome.**

|            |       | M/I/H     | M/I       | M/H       | M           | I           | H        |
|------------|-------|-----------|-----------|-----------|-------------|-------------|----------|
| abs(lfc)>1 | EPO4  | 86 (7.6%) | 88 (7.8%) | 54 (4.8%) | 140 (12.4%) | 8 (0.7%)    | 4 (0.4%) |
|            | Post7 | 22 (3.3%) | 57 (8.5%) | 18 (2.7%) | 121 (18.0%) | 28 (4.2%)   | 0 (0.0%) |
| abs(lfc)<1 | EPO4  | 1 (0.1%)  | 47 (4.2%) | 11 (1.0%) | 613 (54.4%) | 67 (6.0%)   | 7 (0.6%) |
|            | Post7 | 0 (0.0%)  | 47 (7.0%) | 0 (0.0%)  | 246 (36.5%) | 131 (19.4%) | 4 (0.6%) |

**Supplementary Table S4. The number and percentages of identified features overlapped and unique across the biological conditions (EPO4 and Post7) and across the MGI RNA-seq (M), Illumina RNA-seq (I) and GeneChip (H) platforms.** abs(lfc): absolute log<sub>2</sub>-transformed fold change. For M/I/H, M/I and M/H, abs(lfc) grouping is based on the MGI RNA-seq DGE results of the gene features. 34 identified non-protein coding transcript clusters on the GeneChip are removed for the purposes of cross-platform comparison.

| Gene set                                                       | FDR          |
|----------------------------------------------------------------|--------------|
| <b>MGI RNA-seq (15,862 genes)</b>                              |              |
| <u>Enriched in Base2 (5)</u>                                   |              |
| <b>E2F targets</b>                                             | <b>0.067</b> |
| <b>G2M checkpoint</b>                                          | <b>0.070</b> |
| <b>MTORC1 signaling</b>                                        | <b>0.080</b> |
| <b>Glycolysis</b>                                              | 0.106        |
| <b>Adipogenesis</b>                                            | 0.235        |
| <u>Enriched in EPO3 (2)</u>                                    |              |
| <b>Heme metabolism</b>                                         | 0.137        |
| <b>Pancreas beta cells</b>                                     | 0.238        |
| <u>Enriched in EPO4 (7)</u>                                    |              |
| <b>G2M checkpoint</b>                                          | <b>0.007</b> |
| <b>Heme metabolism</b>                                         | <b>0.011</b> |
| <b>Reactive oxygen species pathway</b>                         | <b>0.012</b> |
| <b>Mitotic spindle</b>                                         | <b>0.016</b> |
| <b>Protein secretion</b>                                       | <b>0.038</b> |
| <b>Spermatogenesis</b>                                         | <b>0.038</b> |
| <b>UV response up</b>                                          | 0.191        |
| <u>Enriched in Post7 (6)</u>                                   |              |
| Fatty acid metabolism                                          | 0.197        |
| MTORC1 signaling                                               | 0.206        |
| MYC targets v2                                                 | 0.211        |
| Adipogenesis                                                   | 0.234        |
| <b>MYC targets v1</b>                                          | 0.242        |
| Unfolded protein response                                      | 0.242        |
| <u>Enriched in Base1 (negatively correlated with Post7; 1)</u> |              |
| <b>Heme metabolism</b>                                         | 0.138        |
| <b>Illumina RNA-seq (15,706 genes)</b>                         |              |
| <u>Enriched in Base2 (3)</u>                                   |              |
| <b>G2M checkpoint</b>                                          |              |
| E2F targets                                                    | 0.166        |
| Unfolded protein response                                      | 0.179        |
|                                                                | 0.218        |
| <u>Enriched in EPO4 (1)</u>                                    |              |
| <b>Heme metabolism</b>                                         | <b>0.033</b> |
| <u>Enriched in Base1 (negatively correlated with EPO4; 1)</u>  |              |
| <b>MYC targets v1</b>                                          | <b>0.057</b> |
| <u>Enriched in Post7 (1)</u>                                   |              |

|                                                                |              |
|----------------------------------------------------------------|--------------|
| Oxidative phosphorylation                                      | 0.212        |
| <b>GeneChip HTA2.0 (21,137 genes)</b>                          |              |
| <u>Enriched in Base2 (22)</u>                                  |              |
| <b>Glycolysis</b>                                              | <b>0.003</b> |
| <b>E2F targets</b>                                             | <b>0.010</b> |
| <b>Adipogenesis</b>                                            | <b>0.013</b> |
| <b>G2M checkpoint</b>                                          | <b>0.031</b> |
| <b>MTORC1 signaling</b>                                        | <b>0.100</b> |
| <b>Notch signalling</b>                                        | 0.102        |
| <b>Oxidative phosphorylation</b>                               | 0.114        |
| <b>Apoptosis</b>                                               | 0.115        |
| <b>Mitotic spindle</b>                                         | 0.127        |
| UV response up                                                 | 0.142        |
| <u>Enriched in EPO3 (3)</u>                                    |              |
| <b>Heme metabolism</b>                                         | 0.184        |
| <b>Epithelial mesenchymal transition</b>                       | 0.232        |
| Estrogen response early                                        | 0.242        |
| <u>Enriched in EPO4 (6)</u>                                    |              |
| <b>Heme metabolism</b>                                         | <b>0.005</b> |
| <b>Hypoxia</b>                                                 | 0.174        |
| Xenobiotic metabolism                                          | 0.204        |
| <b>Spermatogenesis</b>                                         | 0.218        |
| <b>UV response up</b>                                          | 0.233        |
| <b>Mitotic spindle</b>                                         | 0.239        |
| <u>Enriched in Base1 (negatively correlated with EPO4; 21)</u> |              |
| <b>P53 pathway</b>                                             | <b>0.098</b> |
| <b>Allograft rejection</b>                                     | 0.119        |
| <b>MYC target v2</b>                                           | 0.120        |
| <b>Fatty acid metabolism</b>                                   | 0.120        |
| <b>WNT beta catenin signaling</b>                              | 0.141        |
| Oxidative phosphorylation                                      | 0.141        |
| Interferon gamma response                                      | 0.146        |
| Unfolded protein response                                      | 0.147        |
| Glycolysis                                                     | 0.148        |
| MYC targets v1                                                 | 0.156        |
| <u>Enriched in Base1 (negatively correlated with Post7; 1)</u> |              |
| <b>Heme metabolism</b>                                         | <b>0.017</b> |

**Illumina Beadchip H12v4 (18,674 genes)**Enriched in EPO3 (7)

|                                          |              |
|------------------------------------------|--------------|
| <b>Heme metabolism</b>                   | <b>0.001</b> |
| <b>Angiogenesis</b>                      | <b>0.010</b> |
| <b>Epithelial mesenchymal transition</b> | <b>0.022</b> |
| <b>Myogenesis</b>                        | <b>0.031</b> |
| <b>Coagulation</b>                       | 0.108        |
| <b>KRAS signaling dn</b>                 | 0.151        |
| <b>Apical junction</b>                   | 0.223        |

Enriched in EPO4 (1)

|                        |              |
|------------------------|--------------|
| <b>Heme metabolism</b> | <b>0.001</b> |
|------------------------|--------------|

Enriched in Base1 (negatively correlated with EPO4; 11)

|                              |              |
|------------------------------|--------------|
| <b>E2F targets</b>           | <b>0.033</b> |
| <b>MYC targets v2</b>        | <b>0.043</b> |
| <b>MYC targets v1</b>        | <b>0.086</b> |
| <b>Allograft rejection</b>   | 0.122        |
| Unfolded protein response    | 0.156        |
| <b>Fatty acid metabolism</b> | 0.175        |
| <b>G2M checkpoint</b>        | 0.189        |
| <b>Peroxisome</b>            | 0.193        |
| Oxidative phosphorylation    | 0.196        |
| <b>MTORC1 signaling</b>      | 0.202        |

Enriched in EPO5 (1)

|                        |                  |
|------------------------|------------------|
| <b>Heme metabolism</b> | <b>&lt;0.001</b> |
|------------------------|------------------|

Enriched in Base1 (negatively correlated with EPO5; 3)

|                            |       |
|----------------------------|-------|
| <b>MYC targets v1</b>      | 0.197 |
| <b>MYC targets v2</b>      | 0.229 |
| <b>Allograft rejection</b> | 0.222 |

Enriched in Post7 (1)

|                   |       |
|-------------------|-------|
| <b>Peroxisome</b> | 0.246 |
|-------------------|-------|

Enriched in Base1 (negatively correlated with Post7; 1)

|                        |              |
|------------------------|--------------|
| <b>Heme metabolism</b> | <b>0.003</b> |
|------------------------|--------------|

Enriched in Base1 (negatively correlated with Post8; 1)

|                        |              |
|------------------------|--------------|
| <b>Heme metabolism</b> | <b>0.004</b> |
|------------------------|--------------|



**Supplementary Table S5. Summary of GSEA results exceeding  $FDR \leq 0.25$  in all Supplementary Data sets against the MSigDB hallmark gene sets.** When the number of enriched gene sets ( $FDR \leq 0.25$ ) exceeds 10, only the top 10 gene sets are included in the table. Enriched gene sets with  $FDR \leq 0.1$  are highlighted in **bold** in the “FDR” column, while gene sets with nominal P value  $\leq 0.05$  are highlighted in **bold** in the “Gene Set” column. Heme metabolism pathway results are marked in **red**.

| Gene            | baseMean  | logFC | lfcSE | s-value  | Condition | GSEA pathways<br>(FDR < 0.1)                                                                                                 | Reactome pathways<br>(FDR < 0.05)                                                                                                        |
|-----------------|-----------|-------|-------|----------|-----------|------------------------------------------------------------------------------------------------------------------------------|------------------------------------------------------------------------------------------------------------------------------------------|
| <i>SLC25A37</i> | 212409.29 | -1.76 | 0.16  | 0        | Post7     | transition metal ion homeostasis (EPO4); iron ion homeostasis (EPO4)                                                         | mitochondrial iron-sulfur cluster biogenesis (EPO4/Post7)                                                                                |
| <i>ALAS2</i>    | 60117.99  | -2.52 | 0.25  | 0        | Post7     | porphyrin-containing compound metabolic process (EPO4); transition metal ion homeostasis (EPO4); iron ion homeostasis (EPO4) | metabolism of porphyrins (EPO4/Post7)                                                                                                    |
| <i>CAI</i>      | 7185.21   | 2.15  | 0.18  | 3.76E-25 | EPO4      | bicarbonate transport (EPO4)                                                                                                 | erythrocytes take up oxygen and release carbon dioxide (EPO4/Post7); erythrocytes take up carbon dioxide and release oxygen (EPO4/Post7) |
| <i>TFDPI</i>    | 6221.33   | 1.80  | 0.15  | 1.06E-24 | EPO4      | N/A                                                                                                                          | transcriptional activity of SMAD2/SMAD3:SMAD4 heterotrimer (EPO4/Post7)                                                                  |
| <i>UBE2F</i>    | 3258.00   | 1.12  | 0.09  | 4.82E-23 | EPO4      | N/A                                                                                                                          | neddylation (EPO4)                                                                                                                       |
| <i>ALAS2</i>    | 60117.99  | 2.49  | 0.25  | 5.08E-20 | EPO4      | porphyrin-containing compound metabolic process (EPO4); transition metal ion homeostasis (EPO4); iron ion homeostasis (EPO4) | metabolism of porphyrins (EPO4/Post7)                                                                                                    |
| <i>AP2A1</i>    | 2565.40   | 1.28  | 0.12  | 1.19E-17 | EPO4      | N/A                                                                                                                          | MHC class II antigen presentation (EPO4); cargo recognition for clathrin-mediated endocytosis (EPO4/Post7)                               |
| <i>RHAG</i>     | 569.34    | 1.31  | 0.14  | 5.43E-16 | EPO4      | erythrocyte development (EPO4); erythrocyte                                                                                  | erythrocytes take up oxygen and release carbon dioxide                                                                                   |

|               |          |      |      |          |      |                                                                                                                        |                                                                                                                                           |
|---------------|----------|------|------|----------|------|------------------------------------------------------------------------------------------------------------------------|-------------------------------------------------------------------------------------------------------------------------------------------|
|               |          |      |      |          |      | homeostasis (EPO4); transition metal ion homeostasis (EPO4); iron ion homeostasis (EPO4); bicarbonate transport (EPO4) | (EPO4/Post7); erythrocytes take up carbon dioxide and release oxygen (EPO4/Post7); rhesus glycoproteins mediate ammonium transport (EPO4) |
| <i>CUL4A</i>  | 10140.15 | 1.00 | 0.10 | 1.07E-15 | EPO4 | N/A                                                                                                                    | neddylolation (EPO4)                                                                                                                      |
| <i>ANKRD9</i> | 1735.58  | 1.60 | 0.17 | 1.15E-15 | EPO4 | N/A                                                                                                                    | neddylolation (EPO4)                                                                                                                      |
| <i>ABCG2</i>  | 909.90   | 1.61 | 0.18 | 1.40E-15 | EPO4 | N/A                                                                                                                    | metabolism of porphyrins (EPO4)                                                                                                           |

**Supplementary Table S6. Top 10 genes resulted from the GSEA GO biological process, Reactome pathway and DESeq2 DGE analyses in the MGI RNA-seq datasets.** LogFC: log<sub>2</sub> fold change; lfcSE: standard error of log<sub>2</sub> fold change; FDR: false discovery rate. N/A: not applicable. Genes are sorted by the *s*-value.

| Gene          | AveExpr | logFC | t     | P.Value  | Adj.P.Val | Condition | GSEA pathways (FDR < 0.1)                                                                                                                                                                                                    | Reactome pathways (FDR < 0.05)                     |
|---------------|---------|-------|-------|----------|-----------|-----------|------------------------------------------------------------------------------------------------------------------------------------------------------------------------------------------------------------------------------|----------------------------------------------------|
| <i>SLC6A8</i> | 6.49    | 2.49  | 13.95 | 1.35E-27 | 1.44E-23  | EPO4      | drug transmembrane transport (EPO5)                                                                                                                                                                                          | creatine metabolism (Post7/8)                      |
| <i>TFDP1</i>  | 8.24    | 1.57  | 12.54 | 3.36E-24 | 5.10E-21  | EPO4      | N/A                                                                                                                                                                                                                          | oxidative stress induced senescence (EPO4/5)       |
| <i>SIAH2</i>  | 7.67    | 1.94  | 11.97 | 8.42E-23 | 5.96E-20  | EPO4      | N/A                                                                                                                                                                                                                          | amyloid fiber formation (EPO3/Post7)               |
| <i>SLC6A8</i> | 6.49    | 2.10  | 11.50 | 1.16E-21 | 1.15E-17  | EPO5      | drug transmembrane transport (EPO5)                                                                                                                                                                                          | creatine metabolism (Post7/8)                      |
| <i>E2F2</i>   | 8.99    | 1.91  | 10.26 | 1.28E-18 | 1.97E-16  | EPO4      | N/A                                                                                                                                                                                                                          | oxidative stress induced senescence (EPO4/5/Post7) |
| <i>MAP2K3</i> | 10.04   | 1.54  | 9.50  | 9.02E-17 | 9.12E-15  | EPO4      | N/A                                                                                                                                                                                                                          | oxidative stress induced senescence (EPO4/5/Post7) |
| <i>SNCA</i>   | 9.98    | 2.29  | 9.14  | 6.96E-16 | 6.21E-14  | EPO4      | regulation of neuronal synaptic plasticity (Post7); regulation of dopamine secretion (Post8); regulation of presynapse organization (Post8); hydrogen peroxide metabolic process (Post7); adult locomotory behaviour (Post7) | amyloid fiber formation (Post7/8)                  |
| <i>SNCA</i>   | 11.32   | -2.21 | -9.37 | 1.86E-16 | 1.41E-13  | Post7     | regulation of neuronal synaptic plasticity (Post7); regulation of dopamine secretion Post8); regulation of                                                                                                                   | amyloid fiber formation (Post7/8)                  |

|               |       |       |       |          |          |       |                                                                                                                  |                                                               |
|---------------|-------|-------|-------|----------|----------|-------|------------------------------------------------------------------------------------------------------------------|---------------------------------------------------------------|
|               |       |       |       |          |          |       | presynapse organization (Post8); hydrogen peroxide metabolic process (Post7); adult locomotory behaviour (Post7) |                                                               |
| <i>TFDPI</i>  | 8.18  | 1.14  | 9.07  | 1.01E-15 | 6.28E-13 | EPO5  | N/A                                                                                                              | oxidative stress induced senescence (EPO4/5)                  |
| <i>GUK1</i>   | 11.61 | -1.38 | -8.74 | 6.38E-15 | 2.71E-12 | Post7 | GDP metabolic process (Post7)                                                                                    | interconversion of nucleotide di- and triphosphates (Post7/8) |
| <i>AP2M1</i>  | 8.48  | 1.03  | 8.33  | 5.77E-14 | 3.69E-12 | EPO4  | N/A                                                                                                              | potential therapeutics for SARS (EPO4/5)                      |
| <i>SIAH2</i>  | 7.67  | 1.45  | 8.44  | 3.30E-14 | 1.13E-11 | EPO5  | N/A                                                                                                              | amyloid fiber formation (EPO3/Post7)                          |
| <i>FURIN</i>  | 6.84  | 1.36  | 7.87  | 7.12E-13 | 3.74E-11 | EPO4  | N/A                                                                                                              | potential therapeutics for SARS (EPO4/5)                      |
| <i>TNRC6C</i> | 7.80  | 1.14  | 7.83  | 8.56E-13 | 4.38E-11 | EPO4  | N/A                                                                                                              | oxidative stress induced senescence (EPO4/5/Post7/8)          |

**Supplementary Table S7. Top 10 genes resulted from the GSEA GO biological process, Reactome pathway and limma DGE analyses in the BeadChip datasets.** AveExpr: average expression values; LogFC: log<sub>2</sub> fold change; Adj.P.Val: BH adjusted *P*-value; FDR: false discovery rate. N/A: not applicable. Genes are sorted by the BH adjusted *P*-value.

**Supplementary Data 1:** Summary of the lfc values of the statistically significant common features present across MGI RNA-seq, Illumina RNA-seq and GeneChip HTA2.0 platforms at both EPO4 and Post7.

**Supplementary Data 2:** Lists of leading edge genes following the GSEA with the hallmark gene sets across all platforms and conditions.

**Supplementary Data 3:** Merged leading edge genes following the GSEA with the hallmark gene sets with the DGE genes identified across MGI RNA-seq, Illumina RNA-seq and GeneChip HTA2.0 platforms.

**Supplementary Data 4:** Merged leading edge genes following the GSEA with the hallmark gene sets with the DGE genes identified on the Illumina BeadChip platform.

**Supplementary Data 5:** Common gene features identified following MGI RNA-seq by merging GSEA leading edge genes and DGE genes across conditions.

**Supplementary Data 6:** Common gene features identified following GeneChip HTA2.0 analysis by merging GSEA leading edge genes and DGE genes across conditions.

**Supplementary Data 7:** Common gene features identified following Illumina BeadChip analysis by merging GSEA leading edge genes and DGE genes across conditions.

**Supplementary Data 8:** Common and platform-independent leading edge genes and pathways across MGI RNA-seq, GeneChip HTA2.0 and Illumina BeadChip platforms following GSEA and the DGE analyses.

**Supplementary Data 9:** Forty-three leading edge genes identified from one or more of the three platforms (MGI RNA-seq, GeneChip HTA2.0 and Illumina BeadChip platforms) overlapping with Illumina RNA-seq DGE genes across conditions.

**Supplementary Data 10:** Reactome pathways represented by the 43 GSEA leading edge genes along with the significantly altered Reactome entities and Reactome pathway FDR involved in these Reactome pathways.

**Supplementary Data 11:** Reactome pathway diagrams represented by the 43 GSEA leading edge genes.

**Supplementary Data 12:** Results of Reacome quantitative pathway analysis of the MGI RNA-seq data.

**Supplementary Data 13:** Results of Reacome quantitative pathway analysis of the Illumina RNA-seq data.

**Supplementary Data 14:** Results of Reacome quantitative pathway analysis of the GeneChip data.

**Supplementary Data 15:** Results of Reactome quantitative pathway analysis of the BeadChip data.

**Supplementary Data 16:** Candidate gene lists and associated pathways in response to EPO following GSEA, Reactome and DGE analyses in the MGI RNA-seq and Illumina BeadChip datasets.
